# Supplementary material for: Specialized coding patterns among dorsomedial prefrontal neuronal ensembles predict conditioned reward seeking
Source: eLife journal article supplement (doi:10.7554/elife.65764), 2021-06-29
Supplement: supp [file elife-65764-supp-v1.zip]

Archive with 10 entries (10 files):
- elife_poa_e65764_Figure_1_video_1.mp4
- elife_poa_e65764_Figure_1_figure_supplement_1.ai
- elife_poa_e65764_Figure_1_figure_supplement_2.ai
- elife_poa_e65764_Figure_1_figure_supplement_3.ai
- elife_poa_e65764_Figure_1_figure_supplement_4.ai
- elife_poa_e65764_Figure_1_figure_supplement_5.ai
- elife_poa_e65764_Figure_4_figure_supplement_1.ai
- elife_poa_e65764_Figure_1_figure_supplement_2.ai
- elife_poa_e65764_Figure_6_figure_supplement_1.ai
- elife_poa_e65764_Transparent_Reporting_File.pdf
